# Supplementary material for: QSAR Study, Molecular Docking and Molecular Dynamic Simulation of Aurora Kinase Inhibitors Derived from Imidazo[4,5-b]pyridine Derivatives
Source: MDPI journal article supplement (doi:10.3390/molecules29081772), 2024-04-13
Supplement: s1 [file s1]

Table S1 The mean and standard deviation values of RMSD and Rg of every Complex

|    | RMSD                     |               | Rg                       |               |
|----|--------------------------|---------------|--------------------------|---------------|
|    | Standard deviation value | Average value | Standard deviation value | Average value |
| S2 | 0.457                    | 1.595         | 0.0909                   | 0.895         |
| N3 | 0.0492                   | 0.233         | 0.0870                   | 1.043         |
| N4 | 0.0567                   | 0.378         | 0.0833                   | 1.049         |
| N5 | 0.0691                   | 0.276         | 0.0657                   | 1.187         |
| N7 | 0.0567                   | 0.378         | 0.0662                   | 0.974         |

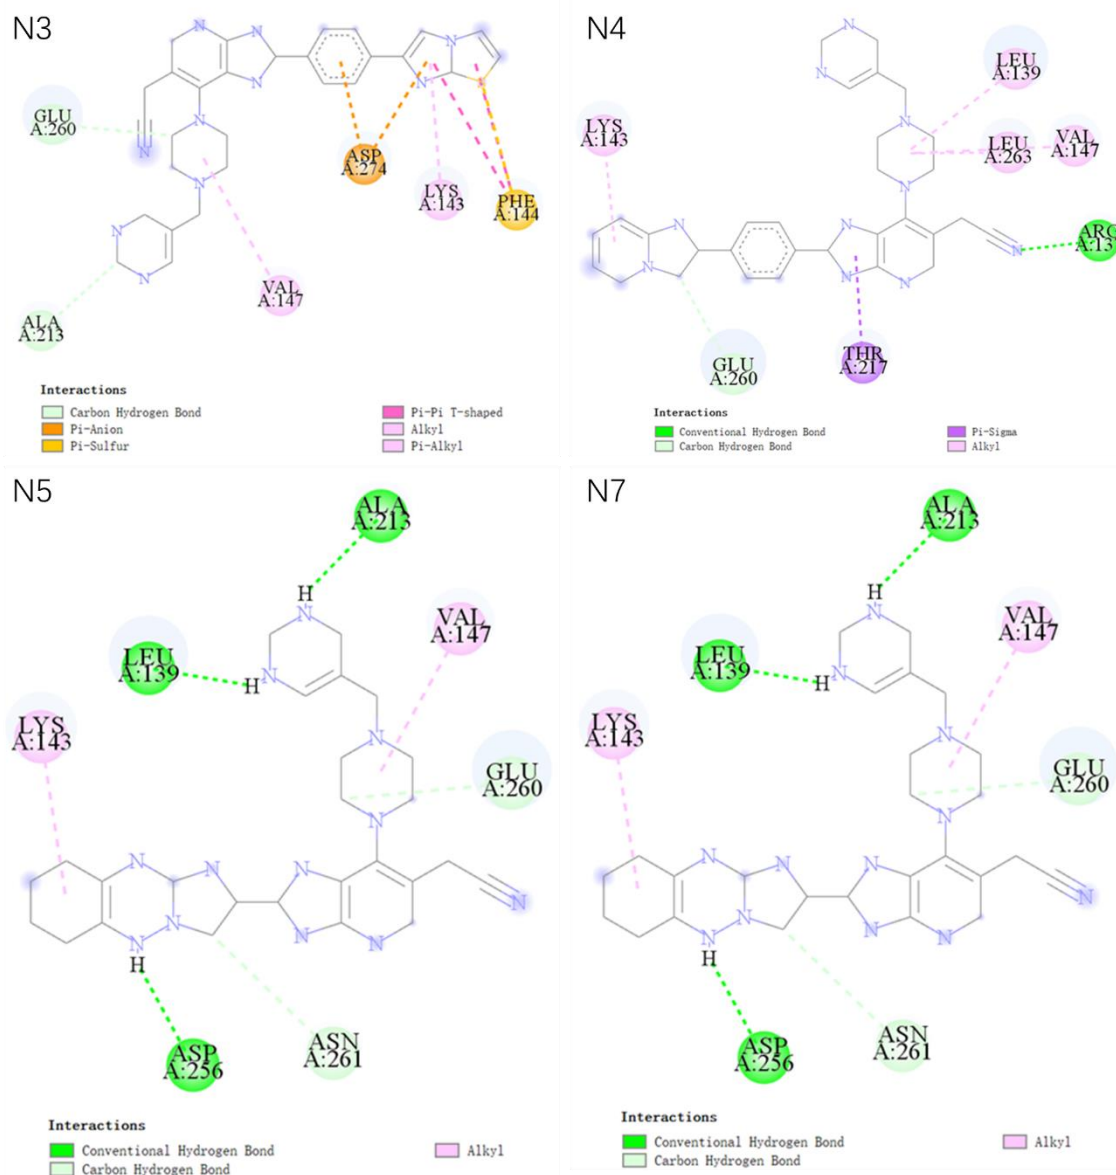

Figure S1. 2D interaction diagram of compounds N3, N4, N5, and N7 docked with receptor proteins
